# Supplementary material for: Suppressive Effects of Lactobacillus on Depression through Regulating the Gut Microbiota and Metabolites in C57BL/6J Mice Induced by Ampicillin
Source: MDPI journal article supplement (doi:10.3390/biomedicines11041068), 2023-04-01
Supplement: s1 [file s1]

## a

| REFERENCE | DATE    |
|-----------|---------|
| GMNL-141  | 1/25/22 |
| COMMENT   |         |

| VERY GOOD IDENTIFICATION |                                                      |
|--------------------------|------------------------------------------------------|
| Strip                    | API 50 CHL V5.2                                      |
| Profile                  | -----+ +-----+ + + + +-----+ + + + + + + + + +<br>-- |
| Note                     |                                                      |

| Significant taxa          | % ID | T   | Tests against |        |  |  |
|---------------------------|------|-----|---------------|--------|--|--|
| Lactobacillus plantarum 1 | 99.9 | 0.7 | SBE 2%        | TAG 7% |  |  |

| Next taxon              | % ID | T    | Tests against |         |         |         |
|-------------------------|------|------|---------------|---------|---------|---------|
| Lactobacillus rhamnosus | 0.1  | 0.23 | LARA 8%       | RHA100% | MDM 7%  | MDG 85% |
|                         |      |      | MEL 9%        | RAF 7%  | GNT 85% |         |

b

| strips no. | carbohydrates substrate           | GMNL-141 | strips no. | carbohydrates substrate             | GMNL-141 | strips no. | carbohydrates substrate   | GMNL-141 |
|------------|-----------------------------------|----------|------------|-------------------------------------|----------|------------|---------------------------|----------|
| 1          | Glycerol                          | -        | 18         | D-Mannitol                          | +        | 35         | D-Raffinose               | +        |
| 2          | Erythritol                        | -        | 19         | D-Sorbitol                          | +        | 36         | Amidon (starch)           | -        |
| 3          | D-Arabinose                       | -        | 20         | Methyl- $\alpha$ -D-mannopyranoside | +        | 37         | Glycogen                  | -        |
| 4          | L-Arabinose                       | -        | 21         | Methyl- $\alpha$ -D-glucopyranoside | -        | 38         | Xylitol                   | -        |
| 5          | D-Ribose                          | +        | 22         | N-Acetyl glucosamine                | +        | 39         | Gentiobiose               | +        |
| 6          | D-Xylose                          | +        | 23         | Amygdalin                           | +        | 40         | D-Turanose                | +        |
| 7          | L-Xylose                          | -        | 24         | Arbutin                             | +        | 41         | D-Lyxose                  | -        |
| 8          | D-Adonitol                        | -        | 25         | Esculin ferric citrate              | +        | 42         | D-Tagatose                | +        |
| 9          | Methyl- $\beta$ -D-Xylopyranoside | -        | 26         | Salicin                             | +        | 43         | D-Fucose                  | -        |
| 10         | D-Galactose                       | +        | 27         | D-Cellobiose                        | +        | 44         | L-Fucose                  | -        |
| 11         | D-Glucose                         | +        | 28         | D-Maltose                           | +        | 45         | D-Arabitol                | -        |
| 12         | D-Fructose                        | +        | 29         | D-Lactose (bovine origin)           | +        | 46         | L-Arabitol                | -        |
| 13         | D-Mannose                         | +        | 30         | D-Melibiose                         | +        | 47         | Potassium gluconate       | -        |
| 14         | L-Sorbose                         | +        | 31         | D-Saccharose (sucrose)              | +        | 48         | Potassium 2-ketogluconate | -        |
| 15         | L-Rhamnose                        | -        | 32         | D-Trehalose                         | +        | 49         | Potassium 5-ketogluconate | -        |
| 16         | Dulcitol                          | -        | 33         | Inulin                              | -        |            |                           |          |
| 17         | Inositol                          | -        | 34         | D-Melezitose                        | +        |            |                           |          |
